# Supplementary material
Source: publisher figshare collection journal article supplement (https://acs.figshare.com/ndownloader/files/3718498)
Supplement: Supplementary file 1 [file 3718498]

## Supporting Information

# Large Scale and Controllable Synthesis of Graphene Quantum Dots from Rice Husk Biomass: A Comprehensive Utilization Strategy

Zhaofeng Wang,<sup>a</sup> Jingfang Yu,<sup>b</sup> Xin Zhang,<sup>a,c</sup> Na Li,<sup>d</sup> Bin Liu,<sup>d</sup> Yanyan Li,<sup>e</sup> Yuhua Wang,<sup>e</sup>  
Weixing Wang,<sup>f</sup> Yezhou Li,<sup>a</sup> Lichun Zhang,<sup>a</sup> Shanka Dissanayake,<sup>g</sup> Steven L. Suib,<sup>a,g</sup> Luyi  
Sun<sup>a,b\*</sup>

<sup>a</sup>*Institute of Materials Science, University of Connecticut, Storrs, Connecticut 06269, United States*

<sup>b</sup>*Department of Chemical & Biomolecular Engineering, University of Connecticut, Storrs, Connecticut 06269, United States*

<sup>c</sup>*Department of Physics and Optoelectronic Engineering, Guangdong University of Technology, Guangzhou 510006, China*

<sup>d</sup>*School of Stomatology, Lanzhou University, Lanzhou, 730000, China*

<sup>e</sup>*Department of Materials Science, School of Physical Science and Technology, Lanzhou University, Lanzhou, 730000, China*

<sup>f</sup>*Ministry of Education Key Laboratory of Enhanced Heat Transfer & Energy Conservation, School of Chemistry and Chemical Engineering, South China University of Technology, Guangzhou, Guangdong 510640, China*

<sup>g</sup>*Department of Chemistry, University of Connecticut, Storrs, Connecticut 06269, United States*

\* Corresponding author.

Dr. Luyi Sun, Tel: (860) 486-6895; Fax: (860) 486-4745; Email: luyi.sun@uconn.edu

## 1. Structural analysis of RHA and RHC

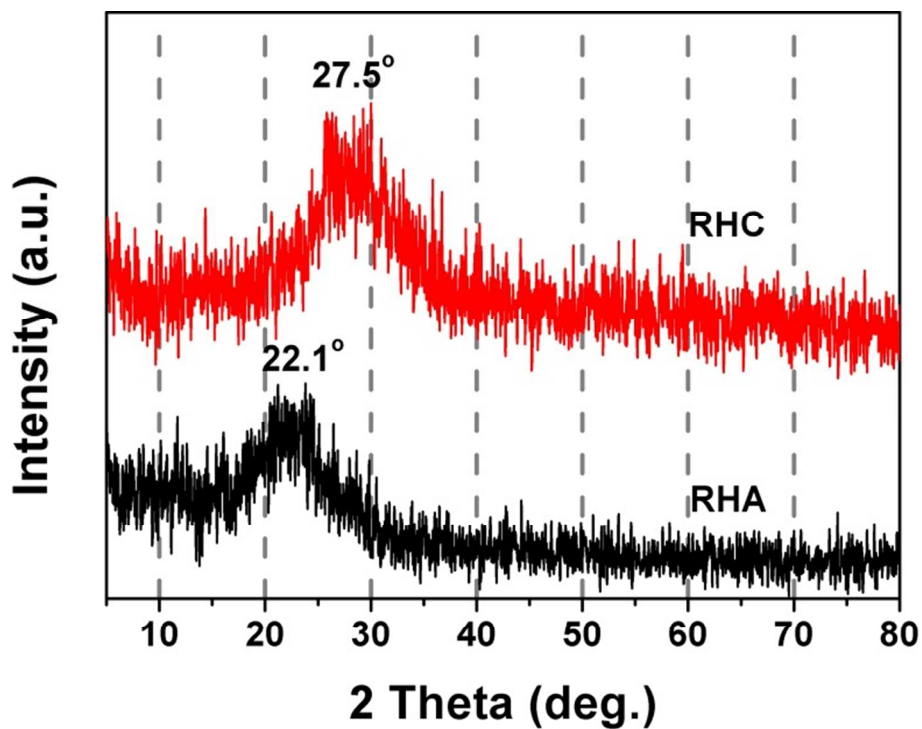

Figure S1. XRD patterns of the as-prepared RHA and RHC. RHA and RHC exhibit broad bands centered at ca. 22.1° and 27.5°, corresponding to the characteristic structures of amorphous silica and carbon, respectively. The evolution of the XRD patterns confirms that RHC was successfully extracted from RHA.

## 2. Morphology of RHC

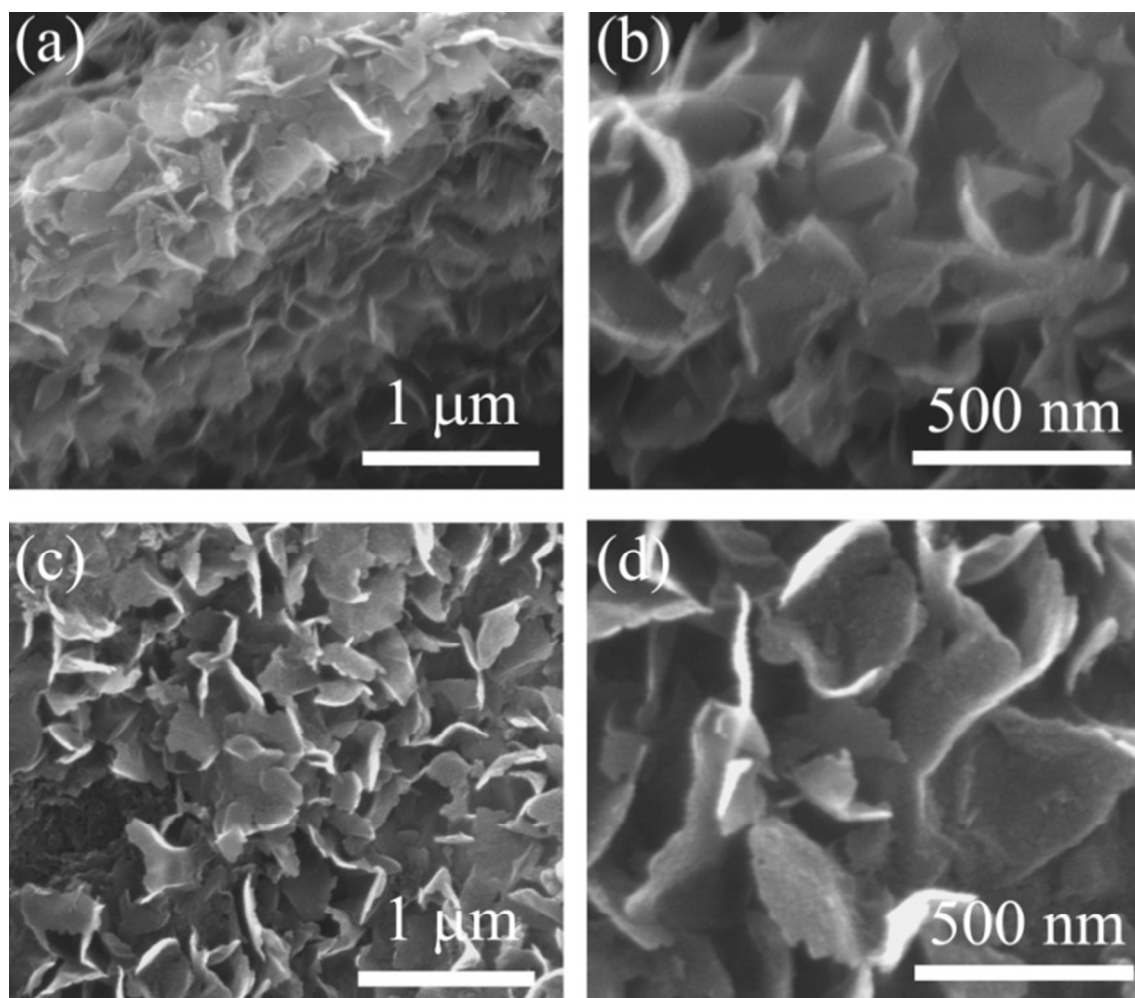

Figure S2. SEM micrographs of RHC (a, b) before and (c, d) after oxidation.

### 3. Characterization of silica from RH derived sodium silicate

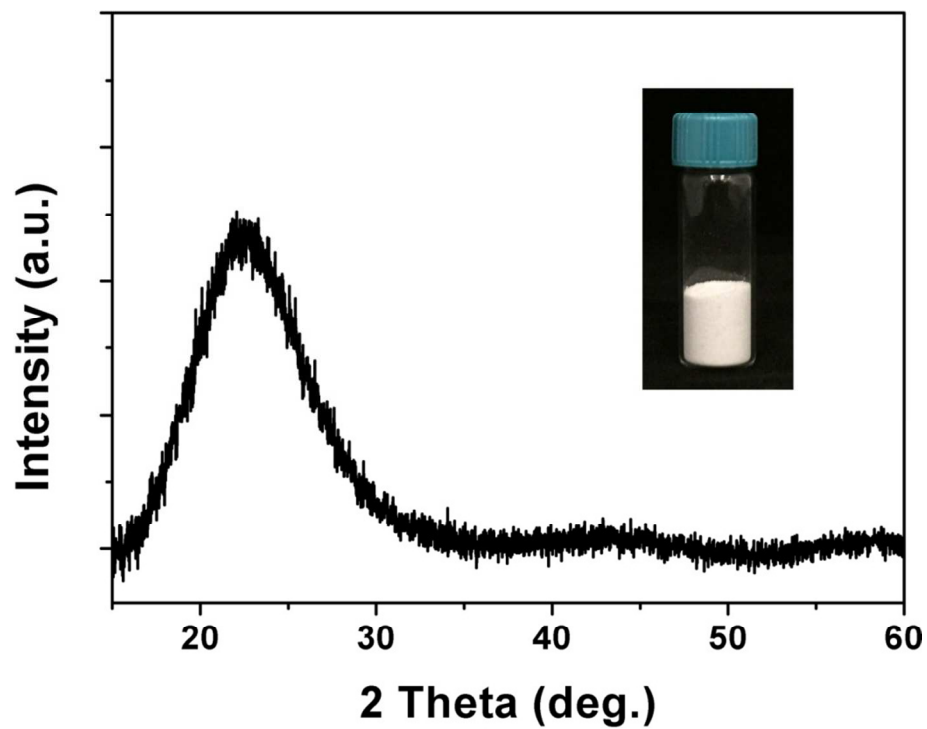

Figure S3. XRD pattern of the silica particles from RH derived sodium silicate; the inset shows the digital photograph of the as-prepared silica.

#### 4. Chemical composition and structure of RH-GQDs

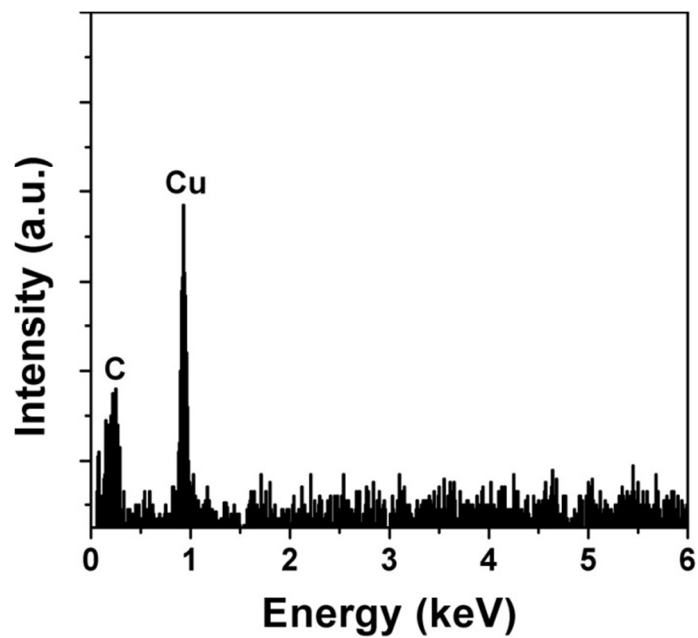

Figure S4. Energy-dispersive X-ray spectroscopy spectrum of the RH-GQDs synthesized at 200 °C.

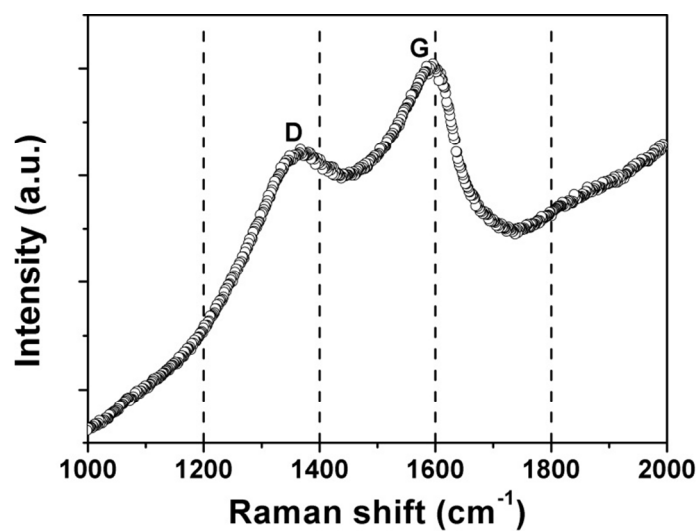

Figure S5. Raman spectrum of the RH-GQDs synthesized at 200 °C.

## 5. Quantum yield calculation

The photoluminescence quantum yield (QY) of the as-prepared RH-GQDs was calculated using Rhodamine B as a reference dye based on the following equation:<sup>1</sup>

$$\eta_s = \eta_{ref} \times \frac{I_s \times \alpha_{ref} \times n_s^2}{I_{ref} \times \alpha_s \times n_{ref}^2}$$

where  $I$ ,  $\alpha$ , and  $n$  represent the integrated area of the PL emission, extinction coefficient at the excitation wavelength, and refractive index of the solvent, respectively, for the sample ( $s$ ) and reference ( $ref$ ).

## 6. PL behaviors

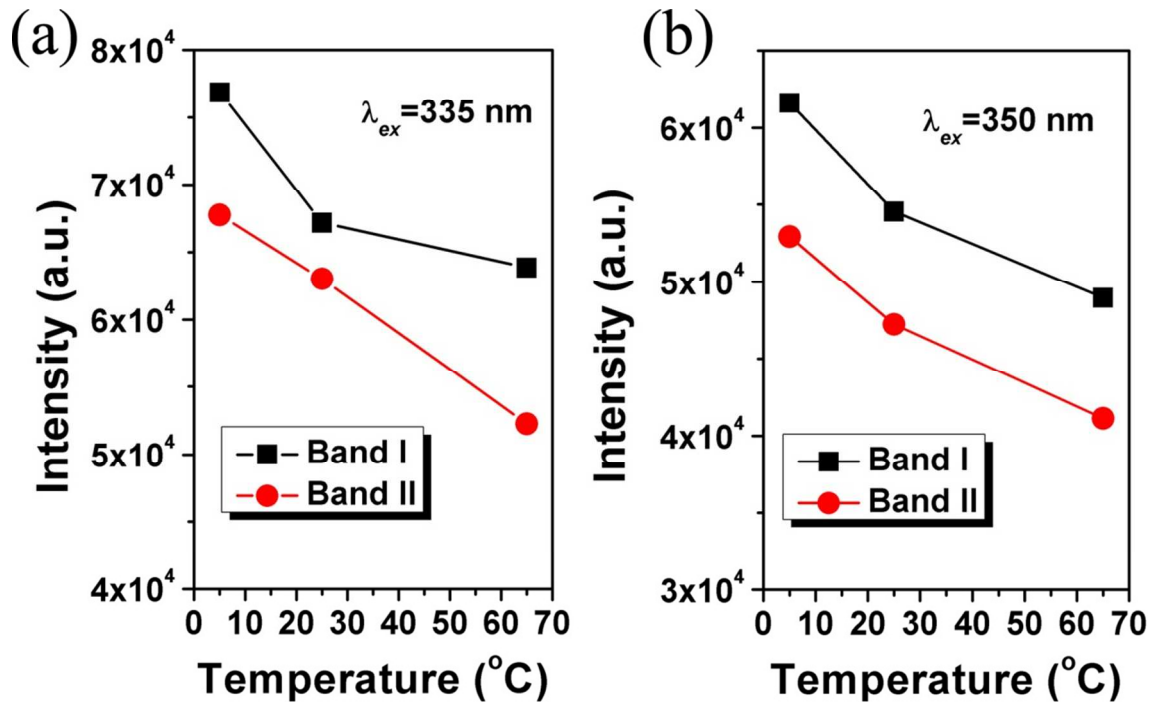

Figure S6. Temperature-dependent PL intensity of RH-GQDs excited by (a) 335 and (b) 350 nm.

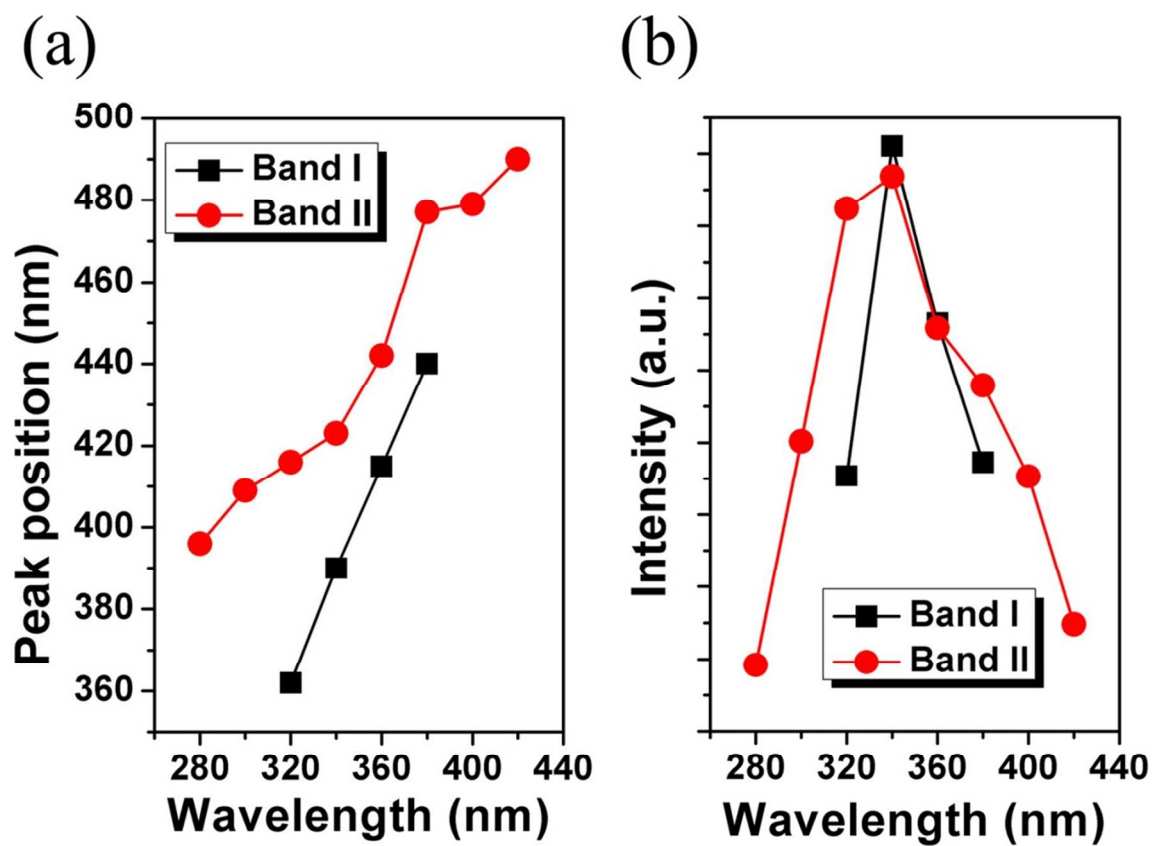

Figure S7. Excitation wavelength dependent PL of the RH-GQDs prepared at 200 °C: (a) peak position and (b) intensity.

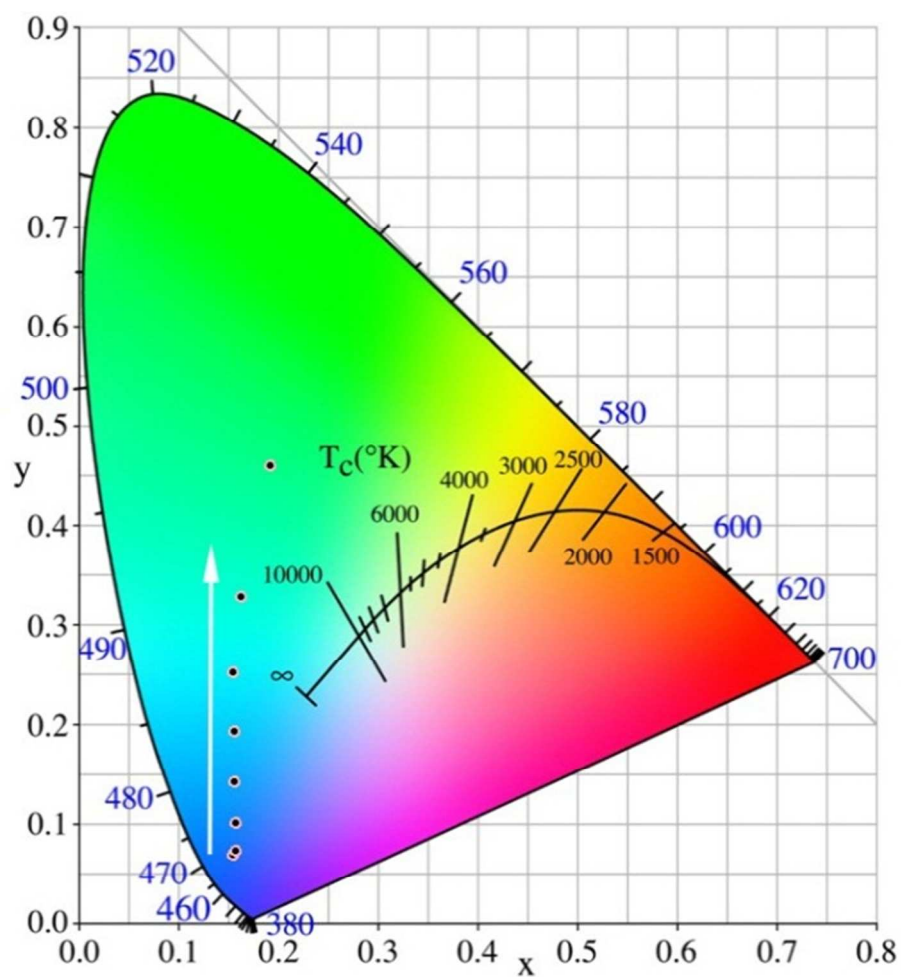

Figure S8. International commission on illumination (CIE) chromaticity diagram for RH-GQDs synthesized at 200 °C with excitation from 300 to 440 nm at 25 °C. The black dots represent the corresponding color coordinates.



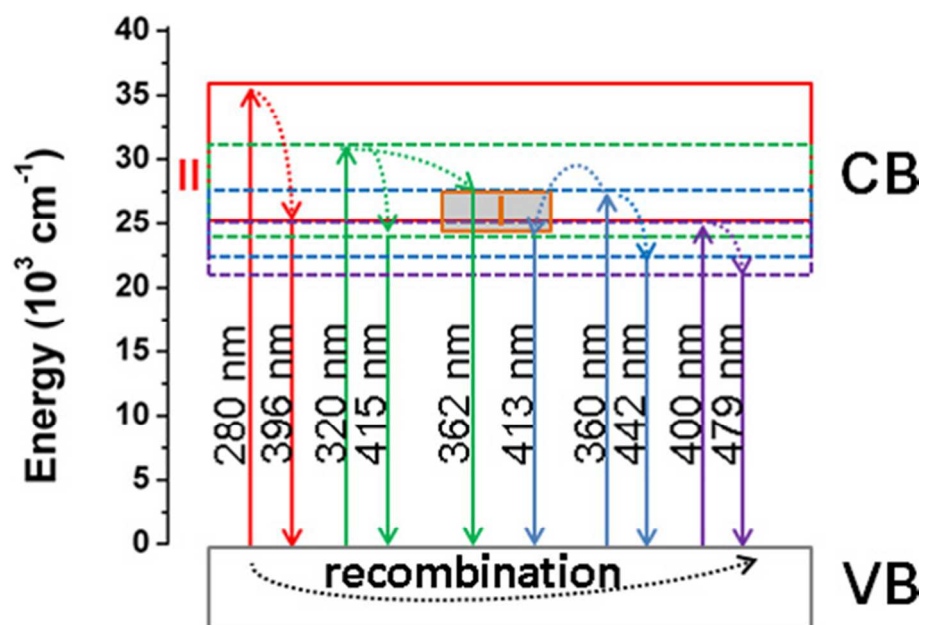

Figure S9. Proposed PL processes of the RH-GQDs based on the intrinsic and defect-related emissions.

## 7. Cell morphology

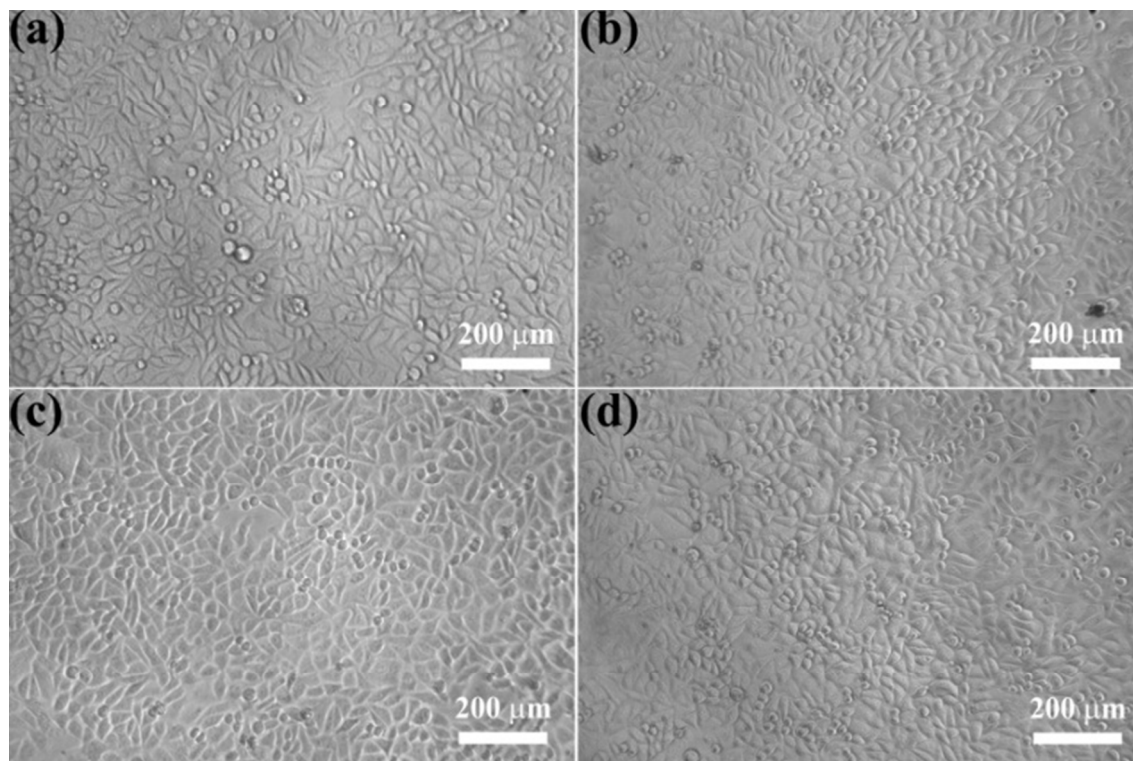

Figure S10. Optical micrographs of HeLa cells after being treated with (a) 0, (b) 25, (c) 50 and (d) 100  $\mu\text{g/mL}$  RH-GQDs for 24 h.

### Reference:

1. Ju, S.-Y.; Kopcha, W. P.; Papadimitrakopoulos, F., Brightly Fluorescent Single-Walled Carbon Nanotubes via an Oxygen-Excluding Surfactant Organization. *Science* **2009**, 323 (5919), 1319-1323.
